# Supplementary material for: Use of low temperature solvothermal reactions in the synthesis of nanocrystalline tantalum nitrides including nanorods
Source: Royal Society of Chemistry journal article supplement (doi:10.1039/b717723b), 2008-01-01
Supplement: b717723b.pdf [file b717723b.pdf]

## Supplementary Information

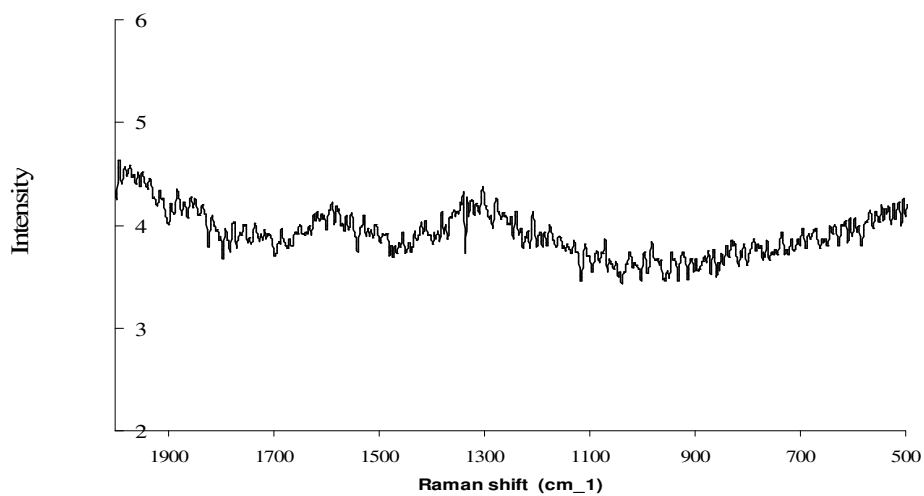

**Fig S1.** Raman spectrum of the Ta<sub>3</sub>N<sub>5</sub> synthesised under high pressure in autoclave showing the signature peaks of graphitic carbon at 1570 and 1325 cm<sup>-1</sup>

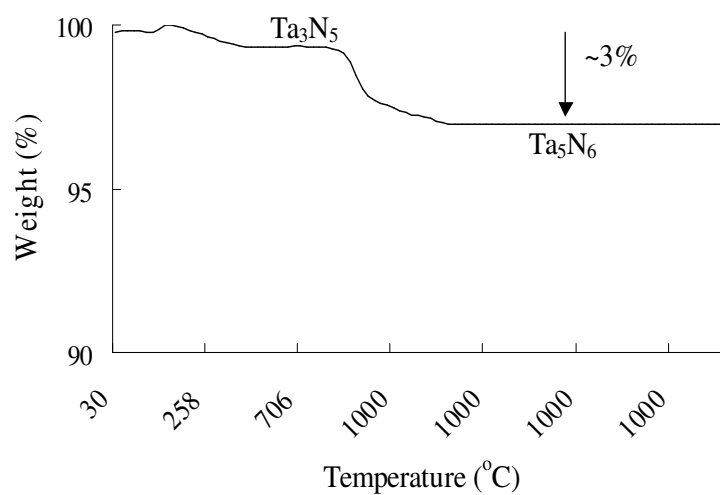

**Fig S2.** TGA trace showing the decomposition of Ta<sub>3</sub>N<sub>5</sub> to Ta<sub>5</sub>N<sub>6</sub> under nitrogen - the product is Ta<sub>5</sub>N<sub>6</sub> by PXD

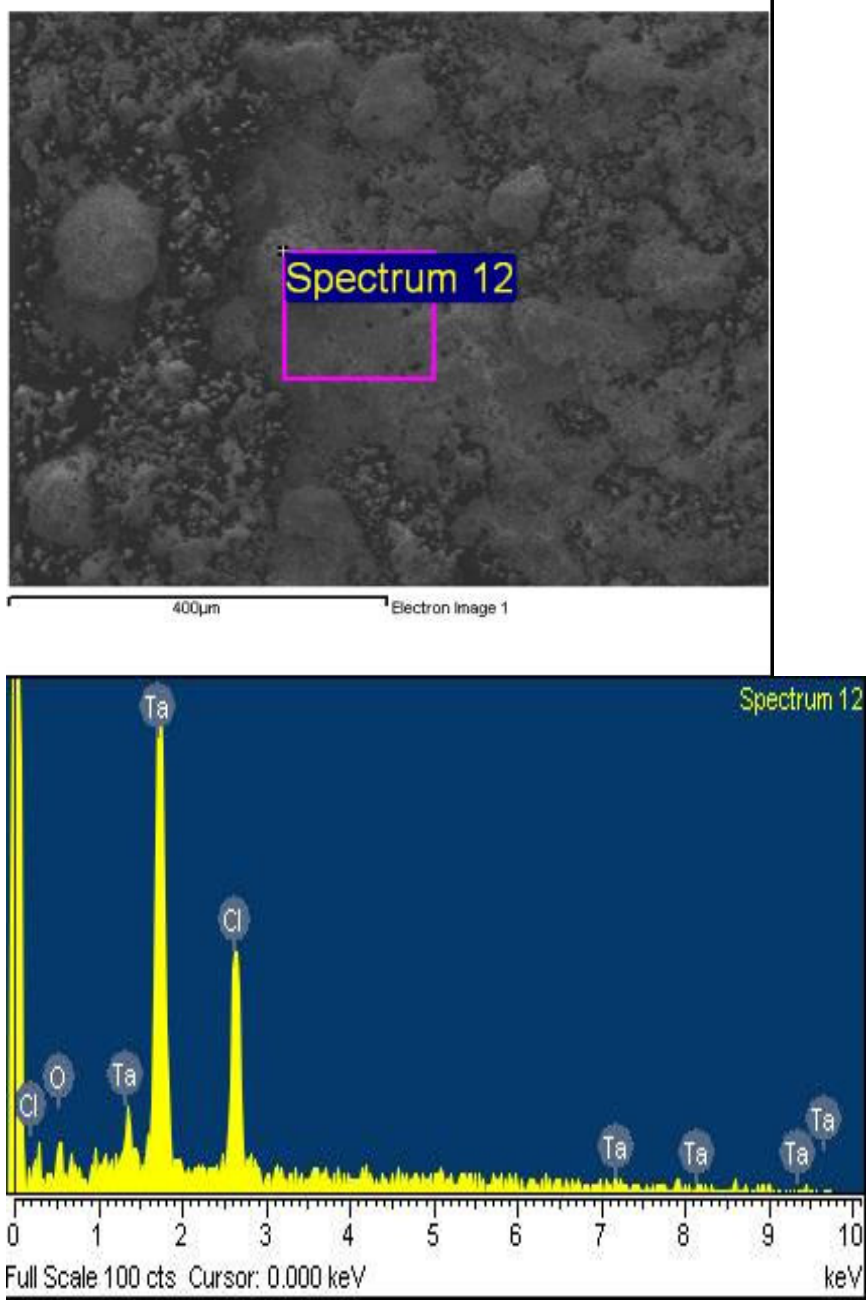

**Fig S3.** SEM micrograph of the product of reaction of  $\text{TaCl}_5$  with commercial  $\text{LiNH}_2$  under ambient pressure before washing with THF. Li is not detectable in the EDX.

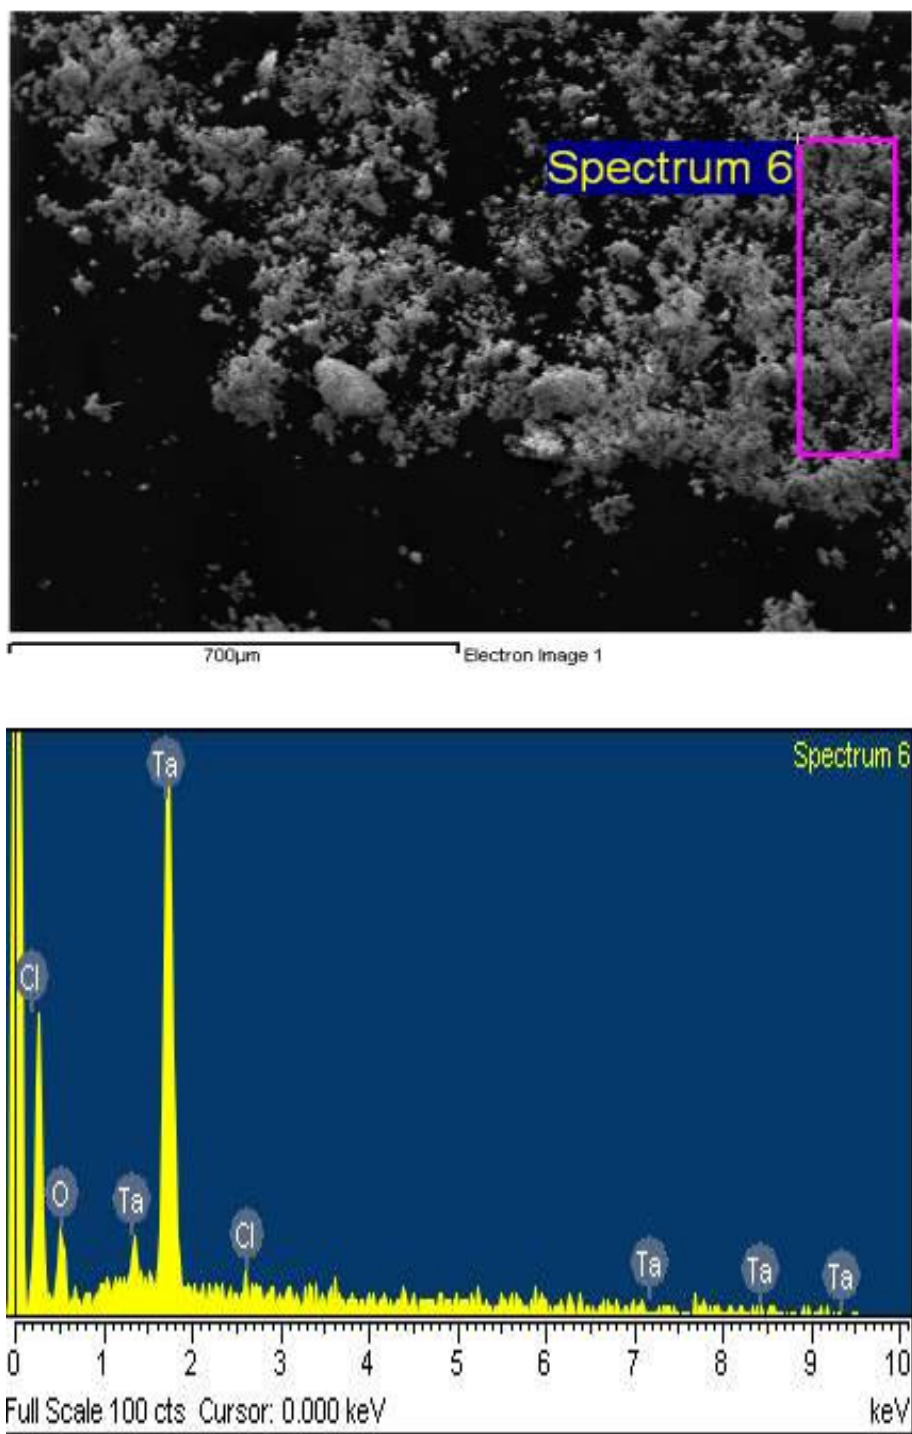

**Fig S4.** SEM micrograph of the product of reaction of  $\text{TaCl}_5$  with commercial  $\text{LiNH}_2$  under reflux after washing with THF (sample 1).

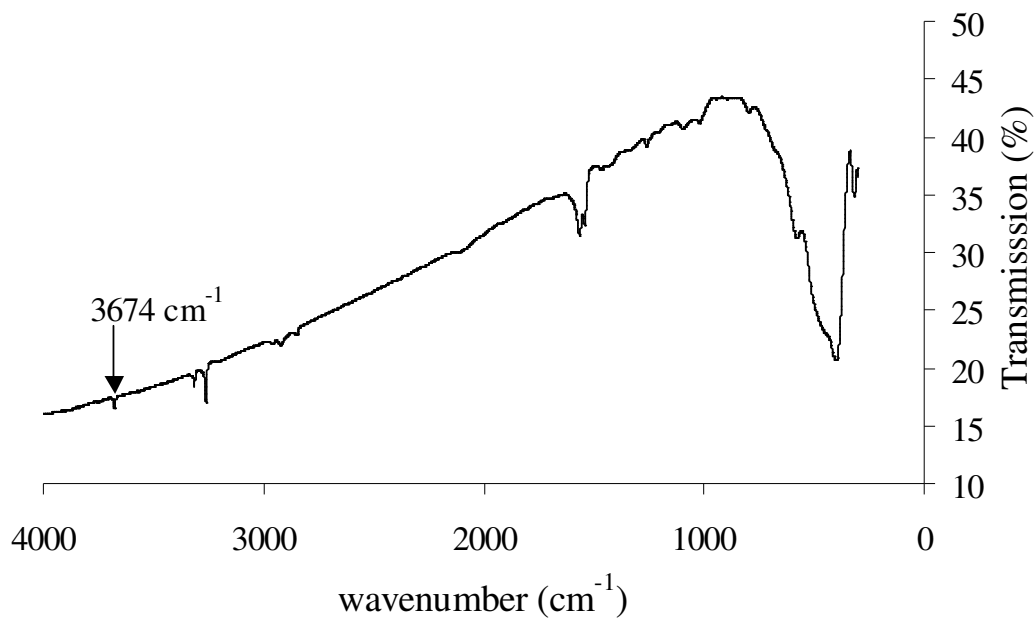

**Fig S5.** Infrared spectrum of commercial  $\text{LiNH}_2$  highlighting the peak corresponding to OH stretching.

(J. C. Decius and S. A. Lilley, *J. Chem. Phys.*, 1970, **53**, 2124)

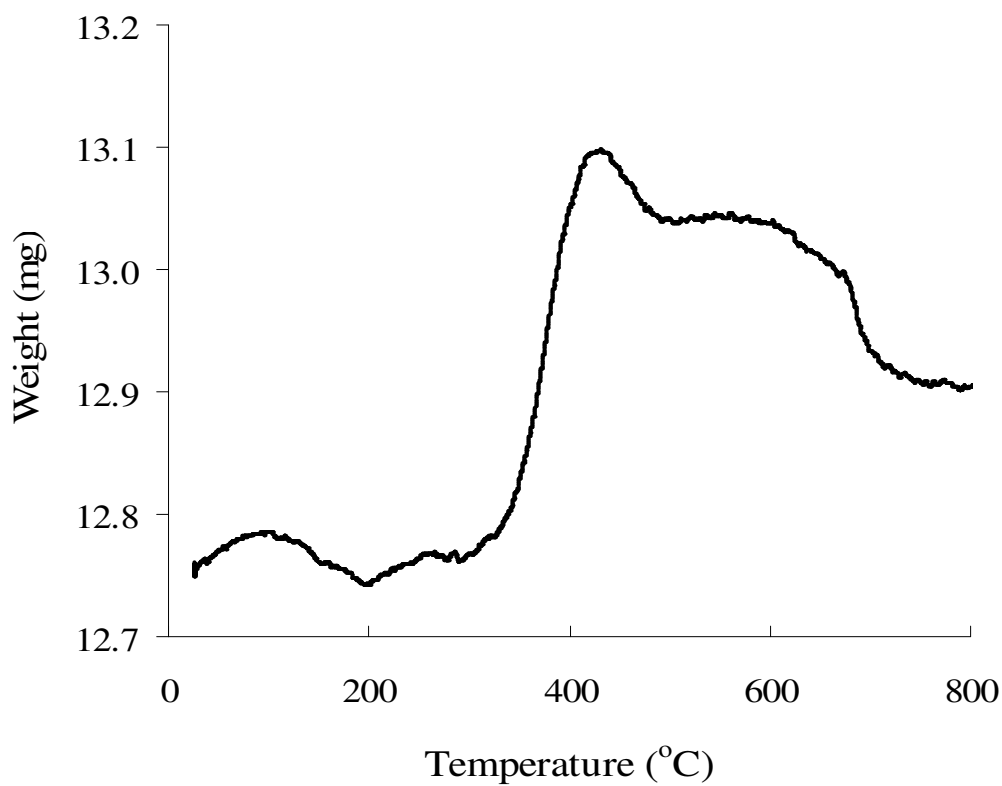

**Fig S6.** TGA profile for the decomposition of  $\text{Ta}_3\text{N}_5$  produced by the reaction between  $\text{TaCl}_5$  and pure  $\text{LiNH}_2$  under high pressure (sample **3**) in oxygen

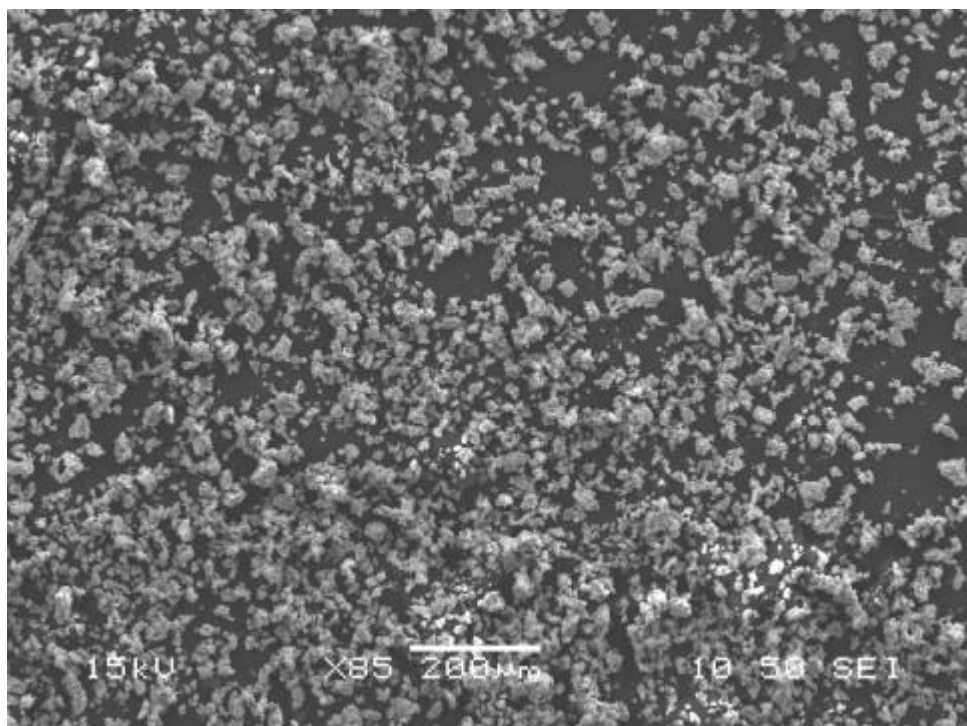

**Fig S7.** SEM micrograph of the product of the reaction of  $\text{TaCl}_5$  with  $\text{Mg}_3\text{N}_2$  under ambient pressure after washing (sample 4)

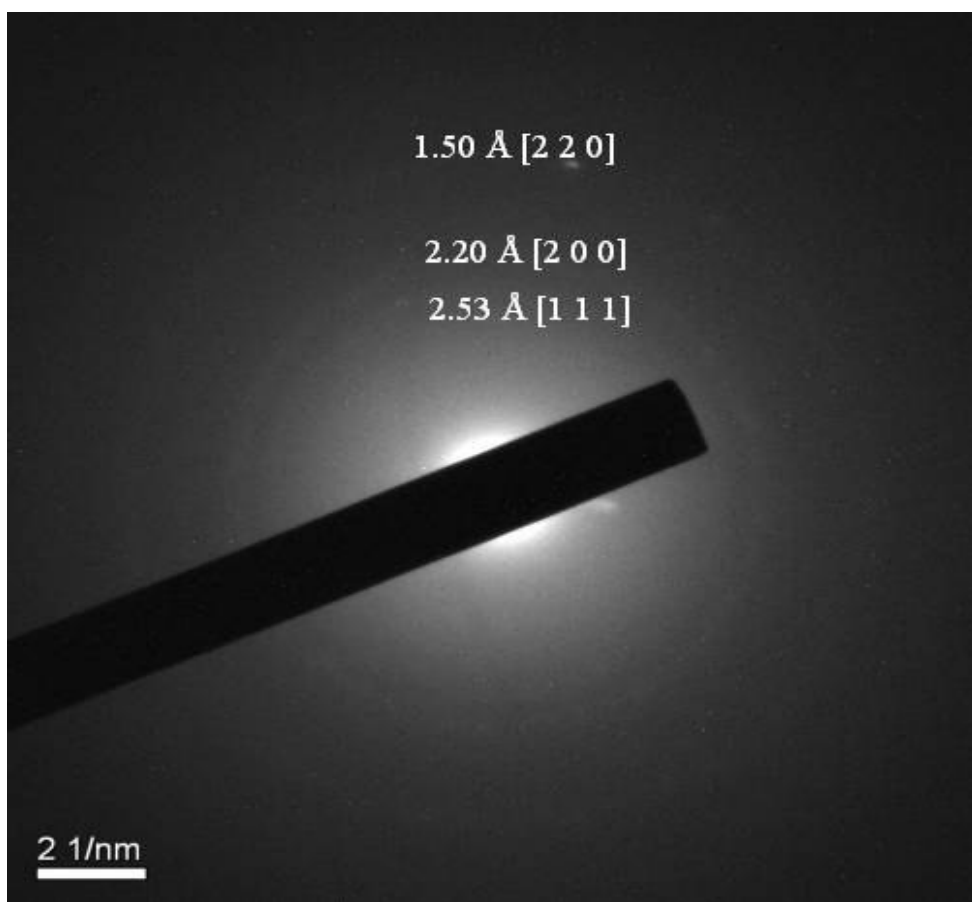

**Fig S8.** Electron Diffraction Pattern of the product of the reaction of TaCl<sub>5</sub> with Mg<sub>3</sub>N<sub>2</sub> under ambient pressure after washing (sample 4)
